# Supplementary material
Source: PubMed Central journal article supplement (PMC7158988)
Supplement: mmc1.pdf [file mmc1.pdf]

# THE LANCET Infectious Diseases

## Supplementary webappendix

This webappendix formed part of the original submission and has been peer reviewed. We post it as supplied by the authors.

Supplement to: Lee VJ, Aguilera X, Heymann D, Wilder-Smith A, for *The Lancet Infectious Diseases* Commission. Preparedness for emerging epidemic threats: a *Lancet Infectious Diseases* Commission. *Lancet Infect Dis* 2020; **20**: 17–19.

## The *Lancet Infectious Diseases* Commission on Preparedness for Emerging Epidemic Threats

### Author List

Vernon J Lee<sup>1,2</sup>, Ximena Aguilera<sup>3</sup>, David Heymann<sup>4</sup>, Annelies Wilder-Smith<sup>4</sup>, Daniel G. Bausch<sup>4,5</sup>, Sylvie Briand<sup>6</sup>, Christianne Brusckke<sup>7</sup>, Eduardo Carmo<sup>8</sup>, Sean Cleghorn<sup>9</sup>, Lalit Dandona<sup>10,11,12</sup>, Christl Donnelly<sup>13,14</sup>, Ibrahima Socé Fall<sup>6</sup>, Jane Halton<sup>15</sup>, Richard Hatchett<sup>15</sup>, Felicia Hong<sup>1</sup>, Peter Horby<sup>16</sup>, Chikwe Ihekweazu<sup>17</sup>, Michael Jacobs<sup>18</sup>, Kamran Khan<sup>19,20,21</sup>, Yijun Lin<sup>1</sup>, Gabriel Leung<sup>22</sup>, Constance Low<sup>1</sup>, Bethan McDonald<sup>16</sup>, Ziad Memish<sup>23,24</sup>, Ryan Morhard<sup>25</sup>, Deborah Ng<sup>1,26</sup>, John Nkengasong<sup>27</sup>, Junxiong Pang<sup>2</sup>, Stephen C. Redd<sup>28</sup>, Karen Tan<sup>29</sup>, Wenqing Yeo<sup>1</sup>.

### Affiliations

1. Ministry of Health, Singapore
2. Saw Swee Hock School of Public Health, Singapore
3. Facultad de Medicina Clínica Alemana Universidad del Desarrollo, Chile
4. London School Hygiene Tropical Medicine, United Kingdom
5. Public Health England
6. World Health Organisation, Geneva, Switzerland
7. Ministry of Agriculture, Nature and Food Quality, The Netherlands
8. Oswaldo Cruz Foundation, Brazil
9. The Lancet Infectious Diseases journal
10. Indian Council of Medical Research, New Delhi, India
11. Public Health Foundation of India Gurugram, National Capital Region, India
12. Institute for Health Metrics and Evaluation, University of Washington, USA
13. Imperial College London, United Kingdom
14. University of Oxford, United Kingdom
15. Coalition for Epidemic Preparedness Innovations
16. University of Oxford, International Severe Acute Respiratory and Emerging Infection Consortium, United Kingdom
17. Nigeria Centre for Disease Control, Nigeria

18. Royal Free London NHS Foundation Trust, United Kingdom
19. St. Michael's Hospital, Toronto, Canada
20. University of Toronto, Canada
21. BlueDot Inc
22. Li Ka Shing Faculty of Medicine of the University of Hong Kong
23. Alfaisal University, Saudi Arabia
24. Prince Mohammed bin Abdulaziz hospital, Ministry of Health, Saudi Arabia
25. World Economic Forum
26. National Centre for Infectious Disease, Singapore
27. Africa Centres for Disease Control and Prevention
28. United States Centres for Disease Control and Prevention
29. Ministry of Communications and Information, Singapore

### **Acknowledgement**

The UK Public Health Rapid Support Team is funded by the United Kingdom Department of Health and Social Care. The views expressed in this publication are those of the author (DG Bausch) and not necessarily those of the National Health System, the National Institute for Health Research or the Department of Health and Social Care.
